# Supplementary material for: A microneedle transdermal patch loaded with iron(ii) nanoparticles for non-invasive sustained delivery to combat anemia
Source: Royal Society of Chemistry journal article supplement (doi:10.1039/d3ma01166f), 2024-01-01
Supplement: d3ma01166f1.pdf [file d3ma01166f1.pdf]

## Supplementary Information

### A Microneedle Transdermal Patch loaded with Iron(II) Nanoparticles for Non-invasive Sustained Delivery to Combat Anemia

Bhavya Surekha,<sup>a</sup> Parimal Misra<sup>a</sup>, Anitha C. Thippaiah,<sup>b</sup> Bindiganavale R. Shamanna,<sup>b</sup> Aiswarya Madathil<sup>c</sup> and Marina Rajadurai<sup>\*a</sup>

<sup>a</sup> Center for Innovation in Molecular and Pharmaceutical Sciences (CIMPS), Dr. Reddy's Institute of Life Sciences, University of Hyderabad Campus, Gachibowli, Hyderabad-500046.

<sup>b</sup> School of Medical Sciences, University of Hyderabad Campus, Gachibowli, Hyderabad-500046.

<sup>c</sup> School of Chemistry, University of Hyderabad Campus, Gachibowli, Hyderabad-500046.

**Table S1.** Some of the tested compositions for preparation of polymeric films containing IS NPs (each experiment repeated in triplicate).

| S. No. | Batch Name         | IS NPs (mg) | PLGA (mg)          | PEG (mg)          | PVA (mg)   | ACN (ml) | Drug Release on day 1 <sup>#</sup> , % (averaged) |
|--------|--------------------|-------------|--------------------|-------------------|------------|----------|---------------------------------------------------|
| 1      | 50IS-PLGA25        | 18.4 (40%)  | 46 (100%), 25 KDa  | -                 | -          | 1        | 2%*                                               |
| 2      | 50IS-PEG2          | 18.4 (40%)  | -                  | 46 (100%), 2 KDa  | -          | 1        | 94%                                               |
| 3      | 50IS-30PLGA25-PEG2 | 18.4 (40%)  | 13.8 (30%), 25 KDa | 32.2 (70%), 2 KDa | -          | 1        | 62%                                               |
| 4      | 50IS-70PLGA25-PEG2 | 18.4 (40%)  | 32.2 (70%), 25 KDa | 13.8 (30%), 2 KDa | -          | 1        | 60%                                               |
| 5      | 30IS-80PLGA25-PVA  | 13.8 (30%)  | 36.8 (80%), 25 KDa | -                 | 9.2 (20%)  | 1        | 47%                                               |
| 6      | 50IS-70PLGA25-PVA  | 18.4 (40%)  | 32.2 (70%), 25 KDa | -                 | 13.8 (30%) | 1        | 61%                                               |
| 7      | 50IS-80PLGA25-PVA  | 18.4 (40%)  | 36.8 (80%), 25 KDa | -                 | 9.2 (20%)  | 1        | 60%                                               |
| 8      | 50IS-90PLGA25-PVA  | 18.4 (40%)  | 41.4 (90%), 25 KDa | -                 | 4.6 (10%)  | 1        | 74%                                               |
| 9      | 30IS-30PLGA25-PEG2 | 13.8 (30%)  | 13.8 (30%), 25 KDa | 32.2 (70%), 2 KDa | -          | 1        | 79%                                               |

|    |                               |            |                                  |                      |   |   |       |
|----|-------------------------------|------------|----------------------------------|----------------------|---|---|-------|
| 10 | 50IS-<br>30PLGA25-<br>PEG2-5  | 36.8 (40%) | 27.6 (30%),<br>25 KDa            | 64.4 (70%),<br>2 KDa | - | 2 | 84%   |
| 11 | 50IS-<br>50PLGA25-<br>PEG2    | 18.4 (40%) | 23 (50%),<br>25 KDa              | 23 (50%), 2<br>KDa   | - | 1 | 83%   |
| 12 | 50IS-<br>50PLGA25-<br>PEG6    | 18.4 (40%) | 23 (50%),<br>25 KDa              | 23 (50%), 6<br>KDa   | - | 1 | 77%   |
| 13 | 50IS-<br>50PLGA25-<br>PEG20   | 18.4 (40%) | 23 (50%),<br>25 KDa              | 23 (50%), 20<br>KDa  | - | 1 | 66%   |
| 14 | 50IS-PEG20                    | 18.4 (40%) | -                                | 46 (100%),<br>20 KDa | - | 1 | 87%   |
| 15 | 30IS-<br>30PLGA120-<br>PEG2   | 13.8 (30%) | 13.8 (30%)<br>(50:50) 120<br>KDa | 32.2 (70%),<br>2KDa  | - | 1 | 86%   |
| 16 | 30IS-<br>30PLGA60-<br>PEG2    | 13.8 (30%) | 13.8 (30%)<br>(75:25) 60<br>KDa  | 32.2 (70%),<br>2KDa  | - | 1 | 89%   |
| 17 | 30IS-<br>30PLGA160-<br>PEG2   | 13.8 (30%) | 13.8 (30%)<br>(75:25) 160<br>KDa | 32.2 (70%),<br>2KDa  | - | 1 | 88%   |
| 18 | 30IS-<br>30PLGA60-<br>PEG2-1  | 13.8 (30%) | 13.8 (30%)<br>(50:50) 60<br>KDa  | 32.2 (70%)<br>2 KDa  | - | 1 | 88%   |
| 19 | 15IS-<br>90PLGA60-<br>PEG2    | 6.9 (15%)  | 41.4 (90%)<br>(50:50) 60<br>KDa  | 4.6 (10%)<br>2 KDa   | - | 1 | 2%**  |
| 20 | 30IS-<br>80PLGA60-<br>PEG2    | 13.8 (30%) | 36.8 (80%)<br>(50:50) 60<br>KDa  | 9.2 (20%)<br>2KDa    | - | 1 | 4%*** |
| 21 | 30IS-<br>70PLGA60-<br>PEG2-3  | 13.8 (30%) | 32.2 (70%)<br>(50:50) 60<br>KDa  | 13.8 (30%)<br>2KDa   | - | 1 | 13%   |
| 22 | 30IS-<br>70PLGA60-<br>PEG10-4 | 13.8 (30%) | 32.2 (70%)<br>(50:50) 60<br>KDa  | 13.8 (30%)<br>10KDa  | - | 1 | 60%   |
| 23 | 30IS-<br>70PLGA60-<br>PEG10-5 | 13.8 (30%) | 32.2 (70%)<br>(50:50) 60<br>KDa  | 13.8 (30%)<br>10KDa  | - | 1 | 58%   |
| 24 | 5IS-70PLGA60-<br>PEG10        | 2.3 (5%)   | 32.2 (70%)<br>(50:50) 60<br>KDa  | 13.8 (30%)<br>10KDa  | - | 1 | 18%   |
| 25 | 10IS-<br>70PLGA60-<br>PEG10   | 4.6 (10%)  | 32.2 (70%)<br>(50:50) 60<br>KDa  | 13.8 (30%)<br>10KDa  | - | 1 | 44%   |

|    |                                      |                                     |                                          |                             |   |          |                                                           |
|----|--------------------------------------|-------------------------------------|------------------------------------------|-----------------------------|---|----------|-----------------------------------------------------------|
| 26 | 20IS-<br>70PLGA60-<br>PEG10          | 9.2 (20%)                           | 32.2 (70%)<br>(50:50) 60<br>KDa          | 13.8 (30%)<br>10KDa         | - | 1        | 45%                                                       |
| 27 | <b>30IS-<br/>70PLGA60-<br/>PEG10</b> | <b>13.8 (30%)</b>                   | <b>32.2 (70%)<br/>(50:50) 60<br/>KDa</b> | <b>13.8 (30%)<br/>10KDa</b> | - | <b>1</b> | <b>26% -<br/>Selected as<br/>the best<br/>formulation</b> |
| 28 | 40IS-<br>70PLGA60-<br>PEG10          | 18.4 (40%)                          | 32.2 (70%)<br>(50:50) 60<br>KDa          | 13.8 (30%)<br>10KDa         | - | 1        | 61%                                                       |
| 29 | 30IS-<br>70PLGA60-<br>PEG10          | 13.8 (30% -<br>bulk IS, not<br>NPs) | 32.2 (70%)<br>(50:50) 60<br>KDa          | 13.8 (30%)<br>10KDa         | - | 1        | 58%                                                       |

# 94-97 % of total loaded drug was released on day 14

\* only 31% of total loaded drug was released on day 7

\*\* only 32% of total loaded drug was released on day 7

\*\*\* only 35% of total loaded drug was released on day 7

The remaining 33 compositions were excluded from Table S1 as they either did not demonstrate any improvement in burst release control or lacked consistency in daily drug release. For clarity, here is a breakdown of the excluded compositions:

1. 20% of PLGA (50:50), 25 kDa, 60 kDa, 120 kDa, 160 kDa mixed with 80% of PEG 2kDa, 6 kDa, and 10 kDa each + 30% IS – 12 compositions;
2. 40% of PLGA (50:50), 25 kDa, 60 kDa, 120 kDa, 160 kDa mixed with 80% of PEG 2kDa, 6 kDa, and 10 kDa each + 30% IS – 12 compositions;
3. 60% of PLGA (50:50), 25 kDa, 60 kDa, 160 kDa mixed with 80% of PEG 2kDa, 6 kDa, and 10 kDa each + 30% IS – 9 compositions.

Additionally, attempts were made to combine PLGA 60 kDa + PEG 2 and 10 kDa with Hyaluronic Acid and Polyvinylpyrrolidone (PVP). Unfortunately, these four compositions did not result in a uniformly mixed matrix and exhibited very uneven drug release (30% IS was used).

**Table S2.** Summary of the tested polymeric compositions with color-coded results for the evaluated parameters.

| Polymer Type  | No PEG/PVA | PEG 2 kDa | PEG 6 kDa | PEG 10 kDa | PEG 20 kDa | PVA   |
|--------------------------------------------------------------------------------------------------|------------|-----------|-----------|------------|------------|-------|
| No PLGA                                                                                          |            | X X X     |           |            | X X        |       |
| PLGA 25 kDa                                                                                      | X          | X         | X X       |            | X X        | X X X |
| PLGA 60 kDa                                                                                      |            | X         |           | ✓          |            |       |
| PLGA 120 kDa                                                                                     |            | X X       |           |            |            |       |
| PLGA 160 kDa                                                                                     |            | X X       |           |            |            |       |

✓ - all parameters are up to expectation

X – one of the parameters is not up to expectation

XX - two parameters are not up to expectation

XXX – all three parameters are not up to expectation

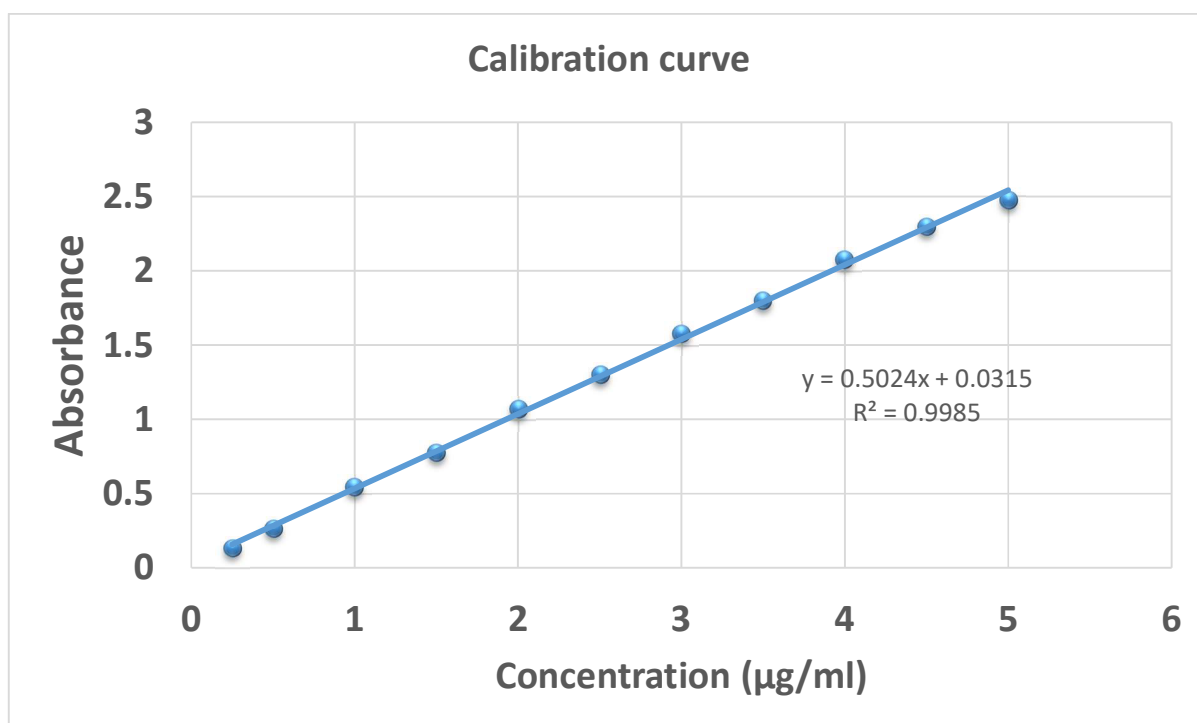

**Figure S1.** The calibration curve for Iron quantification in formulation, developed using Spectroquant Iron Test Kit.

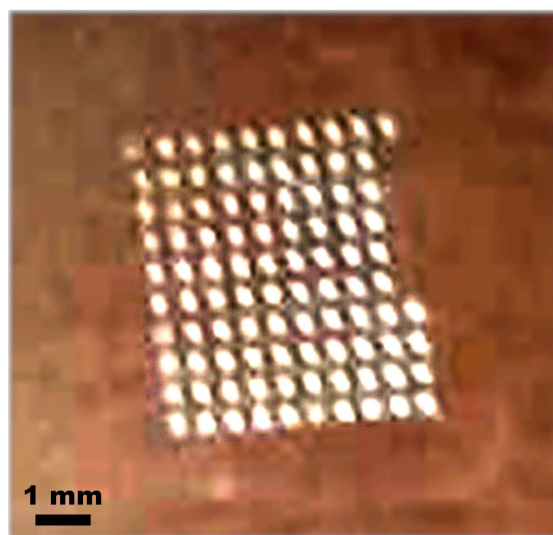

**Figure S2.** Optical microscope image shows artificial skin model after piercing with MNs (MNs patch applied for 5 seconds and removed)

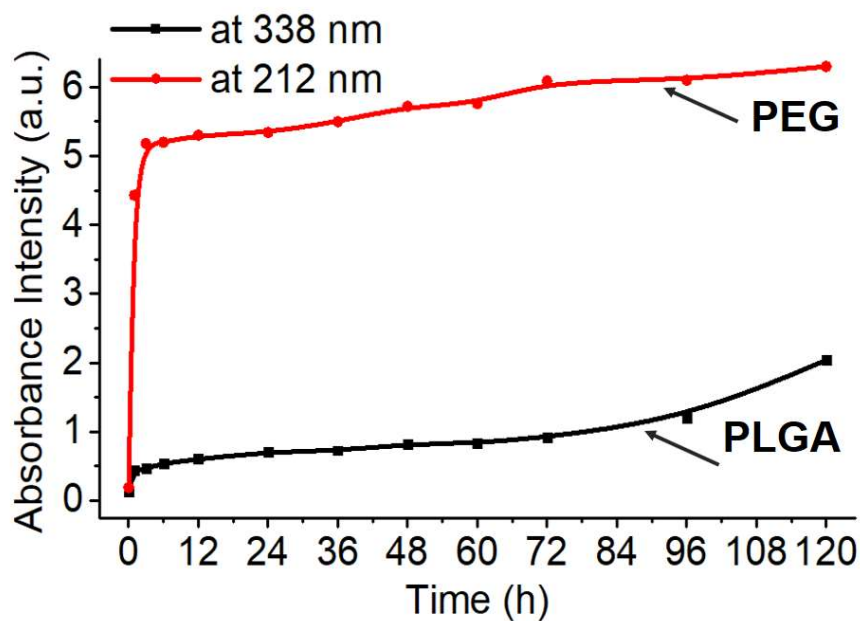

**Figure S3.** Normalized absorbance spectra versus time for the MNs samples immersed in water: demonstrating dissolution of the polymers (PLGA –black line, and PEG – red line). The measurements were done at the following time points: 0, 1h, 3h, 6h, 12h, 36h, 48h, 60h, 72h, 96h, 120h. Produced using UV-vis spectrophotometry (Eppendorf BioSpectrometer - Basic).

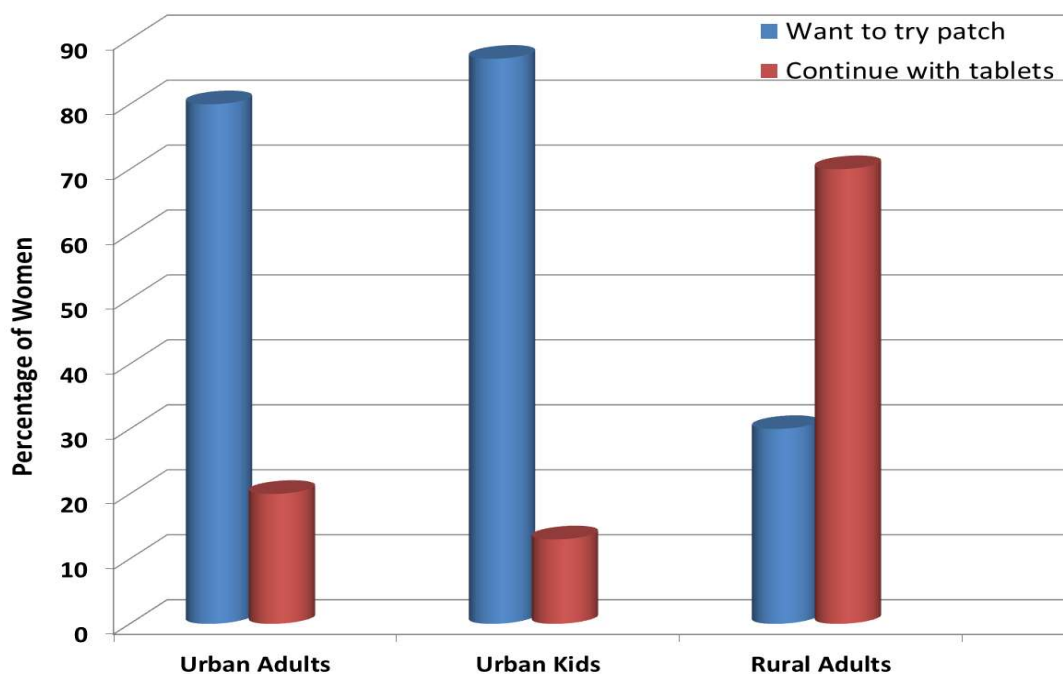

**Figure S4.** The results of the preliminary “Acceptance survey” conducted among potential end-users in urban and rural areas around Hyderabad.

**Table S3.** Acceptance Survey – Potential End Users.

| Sl. No | Criteria                            | Agreed | Neutral | Disagreed |
|--------|-------------------------------------|--------|---------|-----------|
| 1      | Supplements Critical Micronutrients | 89.5%  | 10%     | 0.5%      |

|   |                                                                      |       |       |       |
|---|----------------------------------------------------------------------|-------|-------|-------|
| 2 | Good addition to existing interventions                              | 91.5% | 8.5%  | NIL   |
| 3 | Delivers over extended time period                                   | 30.5% | 51.5% | 18%   |
| 4 | Happy to use patch if it becomes available instead of other existing | 63.2% | 29.5% | 6.3%  |
| 5 | Apply on Self before applying on other family members + males        | 70.6% | 19%   | 10.4% |
| 6 | Interference with my day to day activities                           | 27.4% | 32.6% | 40%   |
| 7 | Concerned that patch may be unaffordable compared to tablets/inj     | 36.7% | 32.6% | 30.7% |
| 8 | Want to see others using it before I use it                          | 47.4% | 24.2% | 28.4% |

**Table S4.** Acceptance Survey – Potential service providers.

| Sl. No | Criteria                                | Agreed | Neutral | Disagreed |
|--------|-----------------------------------------|--------|---------|-----------|
| 1      | Supplements Critical Micronutrients     | 75%    | 13%     | 2%        |
| 2      | Good addition to existing interventions | 93%    | 6%      | 1%        |
| 3      | Delivers over extended time period      | 55%    | 34%     | 11%       |
| 4      | Better or equal to existing modalities  | 41%    | 36%     | 23%       |
| 5      | Apply on Self before applying on others | 78%    | 14%     | 8%        |

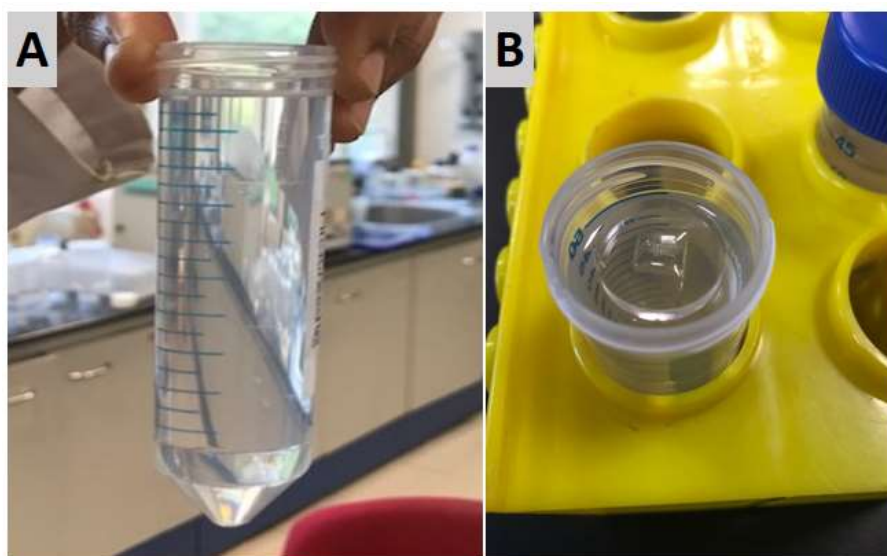

**Figure S5.** A) Falcon tube filled with PDMS used as a stand for MNs mold, and B) MNs template placed in the above stand.
